# Supplementary material for: Copper Pollution Increases the Relative Importance of Predation Risk in an Aquatic Food Web
Source: PubMed Central journal article supplement (PMC4501717; doi:10.1371/journal.pone.0133329), 2015-07-14
Supplement: pone.0133329.s001.pdf [file pone.0133329.s001.pdf]

**S1 Table. ANCOVA statistics of crab and copper effects on whelk consumption rates.**

| Source        | df | MS     | F     | p      |
|---------------|----|--------|-------|--------|
| Crab          | 1  | 551.12 | 23.67 | <0.001 |
| Copper        | 1  | 370.98 | 15.93 | <0.001 |
| Crab X Copper | 1  | 128.84 | 5.53  | 0.023  |
| Error         | 46 | 23.28  |       |        |
