# Supplementary material for: Copper Pollution Increases the Relative Importance of Predation Risk in an Aquatic Food Web
Source: PubMed Central journal article supplement (PMC4501717; doi:10.1371/journal.pone.0133329), 2015-07-14
Supplement: pone.0133329.s002.pdf [file pone.0133329.s002.pdf]

**S2 Table. ANOVA statistics of copper, crab, and culling on whelk consumption rates.**

| Source               | df | MS    | F     | p      |
|----------------------|----|-------|-------|--------|
| Copper               | 1  | 4.57  | 12.52 | 0.001  |
| Crab                 | 1  | 17.74 | 48.60 | <0.001 |
| Culling              | 1  | 1.00  | 2.74  | 0.108  |
| Copper X Crab        | 1  | 4.30  | 11.79 | 0.002  |
| Crab X Cull          | 1  | 0.85  | 2.33  | 0.136  |
| Copper X Cull        | 1  | 1.27  | 3.47  | 0.072  |
| Crab X Copper X Cull | 1  | 1.41  | 3.87  | 0.058  |
| Error                | 32 | 0.37  |       |        |
