# Supplementary material for: Copper Pollution Increases the Relative Importance of Predation Risk in an Aquatic Food Web
Source: PubMed Central journal article supplement (PMC4501717; doi:10.1371/journal.pone.0133329), 2015-07-14
Supplement: pone.0133329.s003.pdf [file pone.0133329.s003.pdf]

**S3 Table. ANOVA statistics of copper and culling effects on whelk consumption rates for crab and no crab treatments.**

Crab Treatments

| Source           | df | MS    | F     | p     |
|------------------|----|-------|-------|-------|
| Copper           | 1  | 0.002 | 0.015 | 0.904 |
| Culling          | 1  | 0.003 | 0.022 | 0.884 |
| Copper X Culling | 1  | 0.002 | 0.015 | 0.904 |
| Error            | 16 | 0.132 |       |       |

No Crab Treatments

| Source           | df | MS    | F      | p     |
|------------------|----|-------|--------|-------|
| Copper           | 1  | 8.871 | 14.831 | 0.001 |
| Culling          | 1  | 1.848 | 3.090  | 0.098 |
| Copper X Culling | 1  | 2.679 | 4.479  | 0.050 |
| Error            | 16 | 0.598 |        |       |
