# Supplementary material for: Copper Pollution Increases the Relative Importance of Predation Risk in an Aquatic Food Web
Source: PubMed Central journal article supplement (PMC4501717; doi:10.1371/journal.pone.0133329), 2015-07-14
Supplement: pone.0133329.s004.pdf [file pone.0133329.s004.pdf]

**S4 Table. ANOVA statistics of the effects of copper and crab predator effect type on whelk consumptive rates.**

| Source               | df | MS   | F     | p      |
|----------------------|----|------|-------|--------|
| Copper               | 1  | 0.35 | 2.34  | 0.140  |
| Predator Effect Type | 2  | 3.50 | 23.37 | <0.001 |
| Copper X Effect Type | 2  | 0.81 | 5.44  | 0.011  |
| Error                | 24 | 0.15 |       |        |
